# Supplementary material for: A strontium isoscape of southwestern Australia and progress toward a national strontium isoscape
Source: Copernicus journal article supplement (doi:10.5194/essd-2024-352), 2024-09-18
Supplement: Supplementary file [file essd-2024-352-AC2-supplement.pdf]

## AC2-Reply to RC2 on essd-2024-352

RC2 reads as follows:

*Excellent work, great and useful data and well presented*

*3rd instalment in series of Sr isotope data around Australia including: de Caritat et al., 2022, 2023*

*Provides comprehensive, detailed, high quality data set and publication for a geographical region where very little was previously known.*

*Significant and valuable dataset for strontium isoscape work*

*Minor question: Figure 3 labelling. Legend says SE Aus, caption northern Australia. Should these both be SW Australia?*

Citation: <https://doi.org/10.5194/essd-2024-352-RC2>

Our Authors Comment in reply to RC2 is below.

We thank Reviewer 2, Dr Jodie Pritchard, for her thoughtful and supportive review of our manuscript.

In response to the specific comment about Figure 3 labelling inconsistency, we have rectified this and thank the Reviewer for picking this error up.
